# Supplementary material for: Coded unicast downstream traffic in a wireless network: analysis and WiFi implementation
Source: Springer Nature journal article supplement (doi:10.1186/1687-6180-2013-25), 2013-02-19

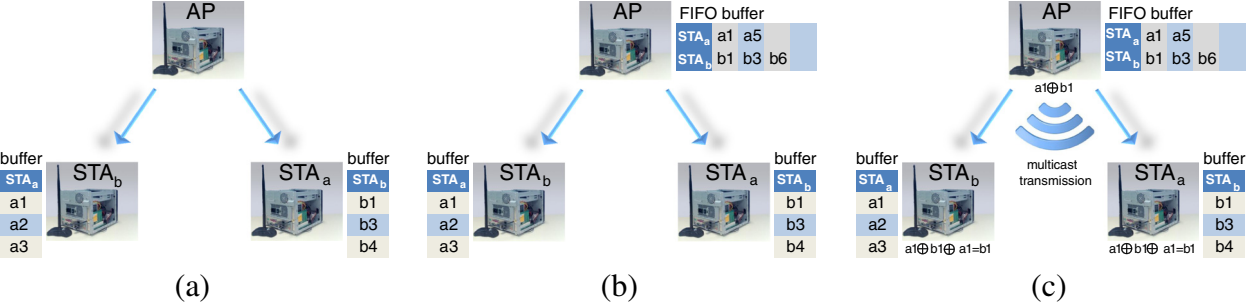

Supplement: 13634_2012_472_MOESM8_ESM.pdf [file 13634_2012_472_MOESM8_ESM.pdf]
