# Supplementary material for: Coded unicast downstream traffic in a wireless network: analysis and WiFi implementation
Source: Springer Nature journal article supplement (doi:10.1186/1687-6180-2013-25), 2013-02-19

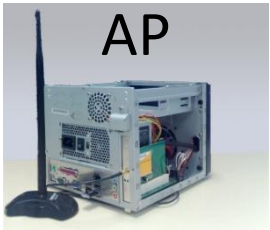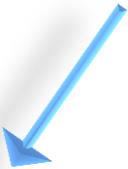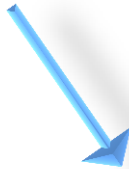

buffer

**STA<sub>a</sub>**

a1

a2

a3

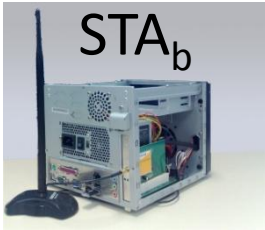

buffer

**STA<sub>b</sub>**

b1

b3

b4

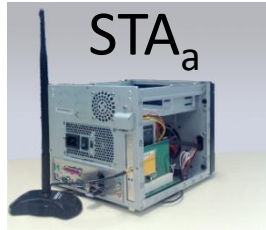

Supplement: 13634_2012_472_MOESM10_ESM.pdf [file 13634_2012_472_MOESM10_ESM.pdf]
