# Supplementary material for: Coded unicast downstream traffic in a wireless network: analysis and WiFi implementation
Source: Springer Nature journal article supplement (doi:10.1186/1687-6180-2013-25), 2013-02-19
Supplement: 13634_2012_472_MOESM11_ESM.pdf [file 13634_2012_472_MOESM11_ESM.pdf]

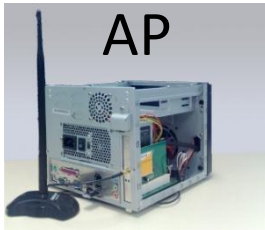

AP

FIFO buffer

|                        |    |    |    |  |
|------------------------|----|----|----|--|
| <b>STA<sub>a</sub></b> | a1 | a5 |    |  |
| <b>STA<sub>b</sub></b> | b1 | b3 | b6 |  |

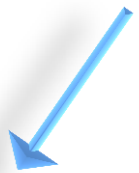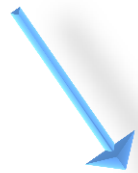

buffer

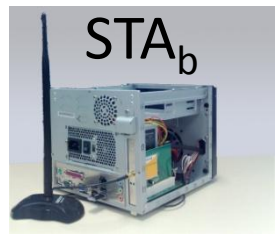

STA<sub>b</sub>

|                        |
|------------------------|
| <b>STA<sub>a</sub></b> |
| a1                     |
| a2                     |
| a3                     |

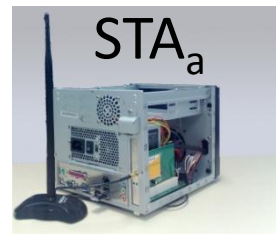

STA<sub>a</sub>

buffer

|                        |
|------------------------|
| <b>STA<sub>b</sub></b> |
| b1                     |
| b3                     |
| b4                     |
